# Supplementary material for: Magnetic cobalt ferrite nanoparticles CoFe2O4platform as an efficient sensor for trace determination of Cu(ii) in water samples and different food products
Source: Royal Society of Chemistry journal article supplement (doi:10.1039/c7nj01857f), 2017-01-01
Supplement: c7nj01857f1.pdf [file c7nj01857f1.pdf]

## Magnetic cobalt ferrite nanoparticles $\text{CoFe}_2\text{O}_4$ platform as an efficient sensor for trace determination of $\text{Cu(II)}$ in water samples and different food products

Mona A. Mohamed<sup>\*a</sup>, Fared M. El-badawy<sup>b,c</sup>, Hanaa S. El-Desoky<sup>\*b</sup>, Mohamed M. Ghoneim<sup>b</sup>

<sup>a</sup>Pharmaceutical Chemistry Department, National Organization for Drug Control and Research (NODCAR), Giza, Egypt

<sup>b</sup>Analytical and Electrochemistry Research Unit, Department of Chemistry, Faculty of Science, Tanta University, 31527 Tanta, Egypt

<sup>c</sup>Egyptian Ministry of Industry, Chemistry Administration, Cairo, Egypt

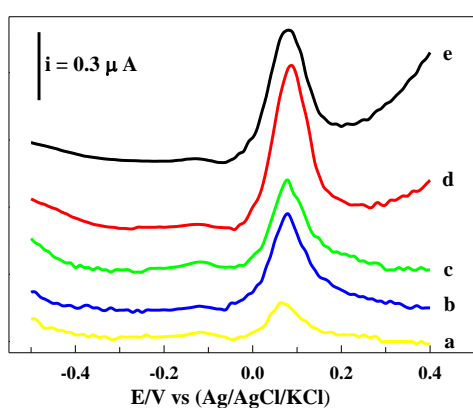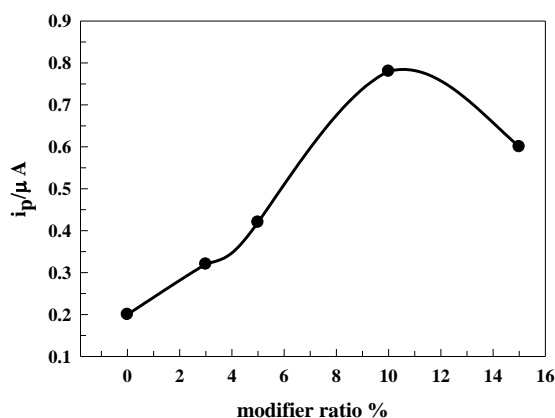

S1. DP-ASV voltammograms for 50 ppb  $\text{Cu(II)}$  in the B-R universal buffer solution of pH 4 at  $E_{\text{acc}} = -0.5$  V for 50 s onto  $\text{CoFe}_2\text{O}_4/\text{CPE}$  with various percentages of  $\text{CoFe}_2\text{O}_4$  and its corresponding plot, where a) 0 %, b) 3 %, c) 5 %, d) 10 %, e) 15 %  $\text{CoFe}_2\text{O}_4$ .

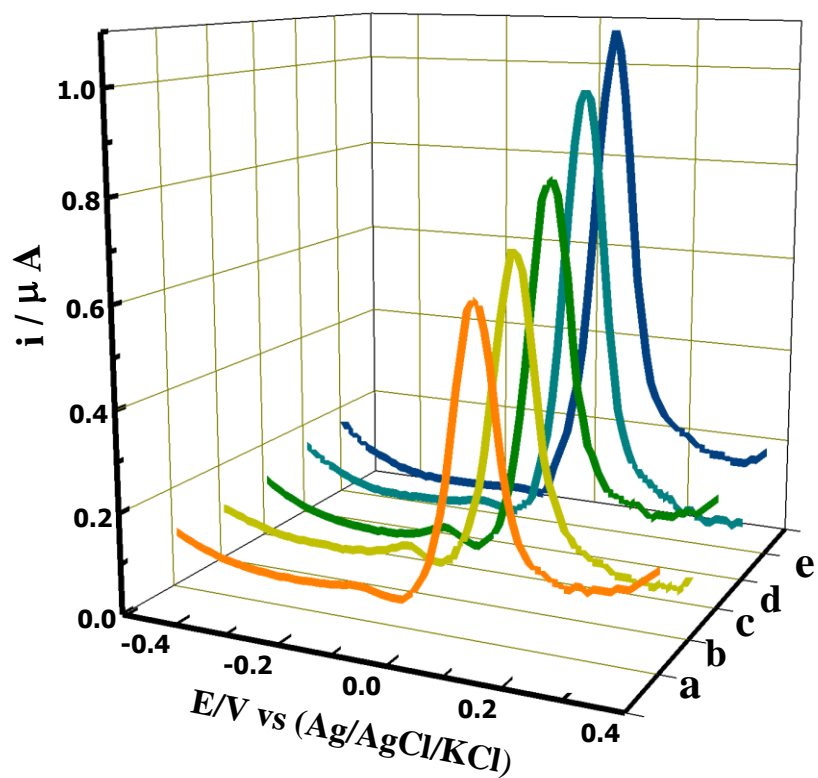

**Fig. S2** Voltammograms for the effect of scan rate on the DP-ASV peak current intensity of 50 ppb Cu(II) in the B-R universal buffer of pH 4 at 10%(w/w) CoFe<sub>2</sub>O<sub>4</sub>/CPE;  $E_{acc} = -0.5$  V and  $t_{acc} = 50$ . a)  $v = 20$  mV/s, b)  $v = 30$  mV/s, c)  $v = 50$  mV/s, d)  $v = 66$  mV/s and e)  $v = 100$  mV/s

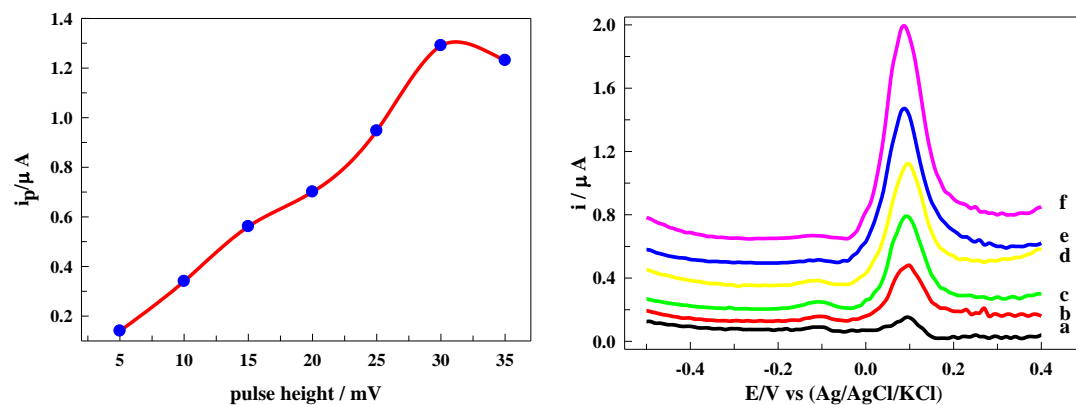

**Fig S3.** Voltammograms and its corresponding plots for the effect of pulse height on the DPASV peak current intensity for 50 ppb Cu in the B-R universal buffer solutions of pH=4 at  $t_{acc}= 50$  s onto the 10% (w/w) CoFe<sub>2</sub>O<sub>4</sub>/CPE a) a=5mV, b) a=10mV, c) a=15mV, d) a=20mV, e) a=25mV and f) a=30mV.

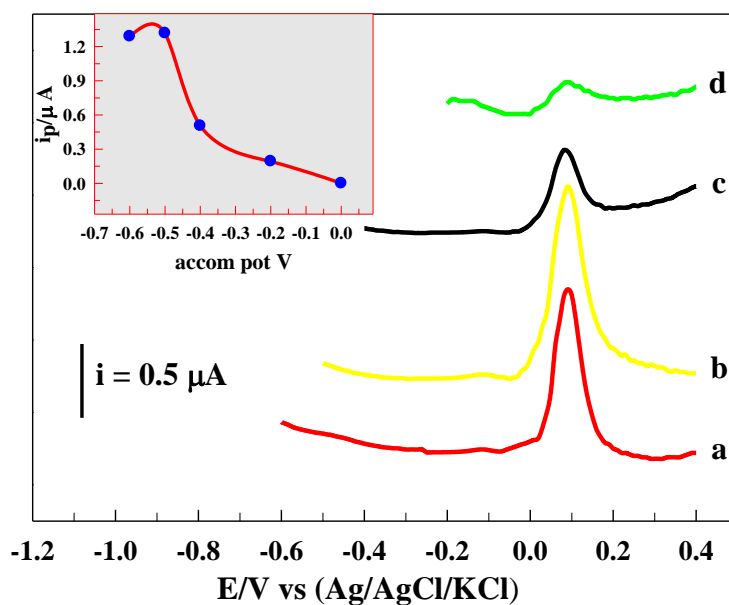

**Fig S4.** Voltammograms and its corresponding plots for the effect of accumulation potential on the DPASV peak current intensity for 50 ppb Cu in the B-R universal buffer solutions of pH=4 at  $t_{acc}= 50$  s onto the 10%(w/w)CoFe<sub>2</sub>O<sub>4</sub>/CPE.

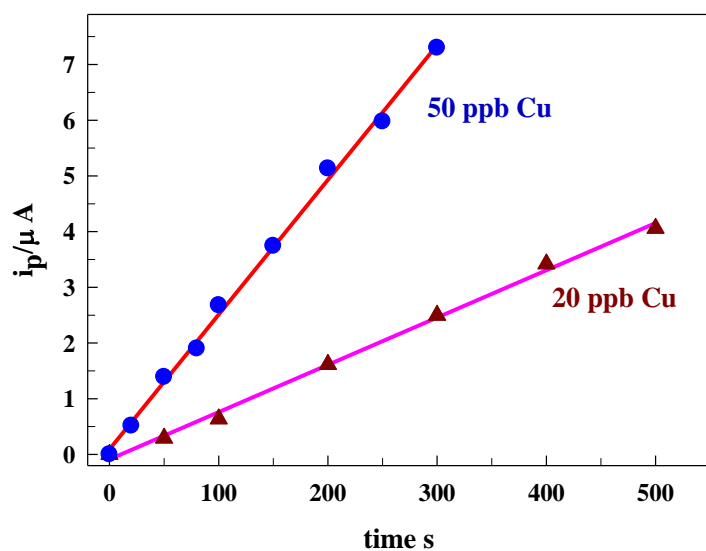

**Fig. S5** Effect of preconcentration time  $t_{acc}$  on DP-ASV peak current for Cu(II) in the B-R universal buffer of pH 4 at  $E_{acc} = -0.5$  V onto 10% (w/w) CoFe<sub>2</sub>O<sub>4</sub>/CPE.

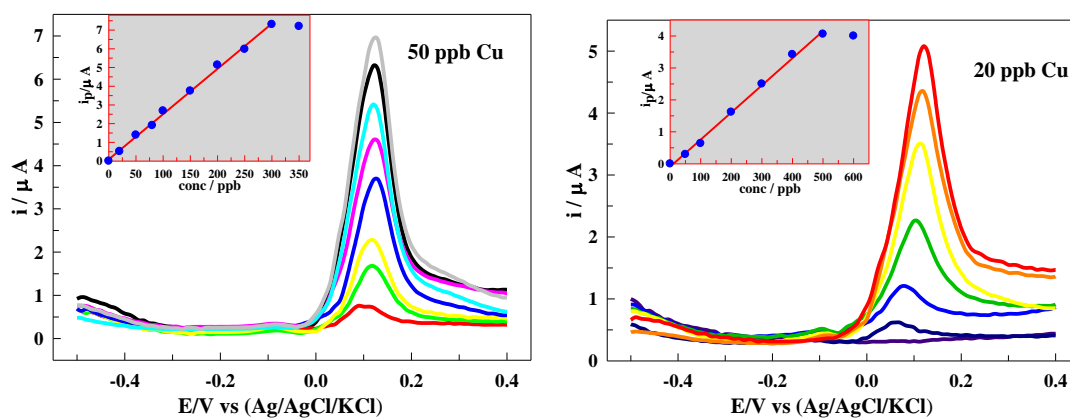

**Fig. S6** DP-dAS voltammograms recorded in the B-R buffer of pH 4 for 50 ppb and 20 ppb of copper in bulk form at 10% (w/w) CoFe<sub>2</sub>O<sub>4</sub>/CPE at various preconcentration for at  $E_{acc} = -0.5$  V.

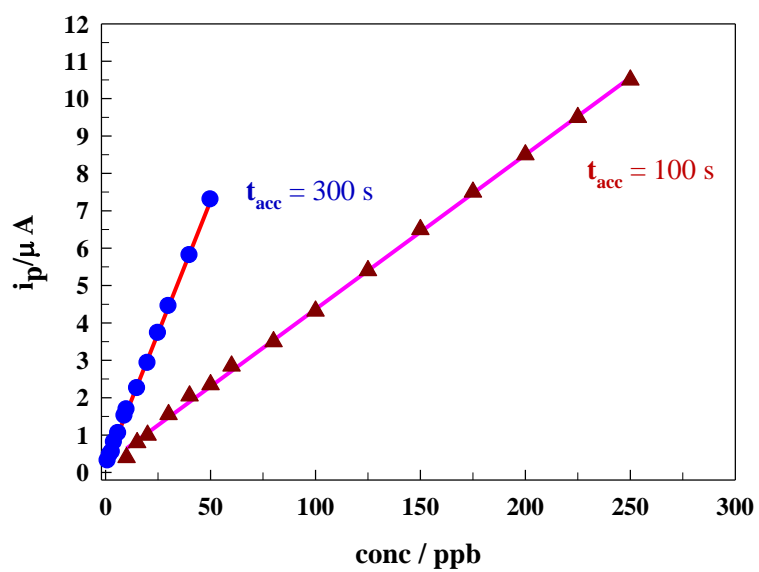

**Fig S7** DP-ASV voltammograms recorded in the B-R buffer of pH 4 for various concentrations of Cu(II) in bulk format 10%(w/w) CoFe<sub>2</sub>O<sub>4</sub>/CPE after preconcentration for 300 and 100 s at  $E_{acc} = -0.5$  V.

**Table S1** Results of intra–day and inter–day assays of various concentrations of bulk Cu by the optimized DP-AdASV method utilizing using 10%(w/w)CoFe<sub>2</sub>O<sub>4</sub>/CPE .

| Day       | [Taken] /<br>M | Mean[Found]<br>M | %R     | % Bias | Precision<br>RSD % |
|-----------|----------------|------------------|--------|--------|--------------------|
| Intra–day |                |                  |        |        |                    |
|           | 10             | 9.99             | 99.90  | – 0.10 | 1.00               |
|           | 50             | 50.30            | 100.60 | 0.60   | 0.9                |
|           | 100            | 99.97            | 99.97  | – 0.03 | 0.74               |
| Inter–day |                |                  |        |        |                    |
| 1         | 10             | 10.02            | 100.20 | 0.20   | 1.00               |
|           | 50             | 50.01            | 100.20 | 0.20   | 0.92               |
|           | 100            | 101.02           | 101.02 | 1.02   | 0.78               |
| 2         | 10             | 9.99             | 99.9   | – 0.10 | 1.01               |
|           | 50             | 51.02            | 102.04 | 2.04   | 0.91               |
|           | 100            | 100.11           | 100.11 | 0.11   | 0.77               |
| 3         | 10             | 9.97             | 99.70  | – 0.30 | 0.98               |
|           | 50             | 49.88            | 99.76  | – 0.24 | 0.88               |
|           | 100            | 98.78            | 98.78  | – 1.22 | 0.68               |

**Table S2** Validation studies for determination of 40 ppb Cu at  $t_{acc}= 300s$  and 150 ppb Cu at  $t_{acc}= 100s$  by means of the described DP-AdASV method onto CPE and 10%(w/w)CoFe<sub>2</sub>O<sub>4</sub>/CPE.

| <b>Variables</b>                    | <b>Operational Conditions</b>   | <b>R ± RSD.%<br/>(n = 3)</b> |
|-------------------------------------|---------------------------------|------------------------------|
| pH                                  | $E_{acc} = -0.50 V$             | 98.95                        |
| 3.50                                |                                 | 99.58                        |
| 4.00                                |                                 | 99.99                        |
| 4.50                                |                                 |                              |
| Preconcentration potential          |                                 |                              |
| $(E_{acc})$                         | pH = 4.00                       | 99.85                        |
| -0.55                               |                                 | 99.58                        |
| -0.50                               |                                 | 100.01                       |
| -0.45                               |                                 |                              |
| Preconcentration time ( $t_{acc}$ ) |                                 |                              |
| 95                                  | pH =4.00<br>$E_{acc} = -0.50 V$ |                              |
| 100                                 |                                 | 97.18                        |
| 105                                 |                                 | 100.55                       |
|                                     |                                 | 101.25                       |
| 290                                 |                                 | 98.53                        |
| 300                                 |                                 | 99.98                        |
| 310                                 |                                 | 10.66                        |



**Table S3** Interferences from foreign species on analysis of 150 ppb Cu at  $t_{acc}= 100$  s by the optimized DP-AdASV method utilizing the onto 10%(w/w)CoFe<sub>2</sub>O<sub>4</sub>/CPE.

| Foreign species                                                                                                                                         | (M)                   |
|---------------------------------------------------------------------------------------------------------------------------------------------------------|-----------------------|
| Na <sup>+</sup> and K <sup>+</sup>                                                                                                                      | $5.50 \times 10^{-3}$ |
| Ca <sup>2+</sup> , Mg <sup>2+</sup>                                                                                                                     | $4.00 \times 10^{-4}$ |
| Cl <sup>-</sup> , SO <sub>4</sub> <sup>-2</sup> , PO <sub>4</sub> <sup>-3</sup> and Ac <sup>-</sup>                                                     | $4.60 \times 10^{-3}$ |
| Oxalic acid, uric acid, glucose, sucrose, starch, gelatin and lactose                                                                                   | $5.00 \times 10^{-4}$ |
| Vitamins A,C and E                                                                                                                                      | $5.00 \times 10^{-5}$ |
| Zn <sup>2+</sup> , Cd <sup>2+</sup> , Al <sup>3+</sup> , Se <sup>4+</sup> , Pb <sup>2+</sup> , As <sup>2+</sup> , Sn <sup>2+</sup> and Fe <sup>3+</sup> | 3 : 25 ppm            |

\*For 5 % signal error
